# Supplementary material for: The Simple One-Step (SOS) Stool Processing Method for Use with the Xpert MTB/RIF Assay for a Child-Friendly Diagnosis of Tuberculosis Closer to the Point of Care
Source: PubMed Central journal article supplement (PMC8373220; doi:10.1128/jcm.00406-21), 2021-07-19
Supplement: jcm.00406-21-s0002.pdf [file jcm.00406-21-s0002.pdf]

## Supplemental material Table S1

**Table S1.** Overview of the various experiments conducted during the method development phase of this study and the results of the various protocols conducted for the various amounts of stool tested by Xpert. Results are stratified by experiment and quantity of stool used in each experiment as outlined in figure S1.

| Demonstration experiments | Test protocol includes |            |                | Amount of stool (gram) |                          |        |             |                   |             |         |             |
|---------------------------|------------------------|------------|----------------|------------------------|--------------------------|--------|-------------|-------------------|-------------|---------|-------------|
|                           | Bead-beating           | Filtration | Dilution (1:1) | 0.3                    |                          | 0.5    |             | 0.8               |             | 1.0     |             |
|                           |                        |            |                | SPC-Ct <sup>#</sup>    | $\Delta$ Ct <sup>‡</sup> | SPC-Ct | $\Delta$ Ct | SPC-Ct            | $\Delta$ Ct | SPC-Ct  | $\Delta$ Ct |
| A (SOS)                   | No                     | No         | No             | 25.5                   | 0.1                      | 29.9   | 4.5         | nd*               | nd          | 36.4    | 11          |
| B (TS)                    | No                     | No         | Yes            | 33.3                   | 7.9                      | 33.4   | 8           | nd                | nd          | 33.2    | 7.8         |
| C                         | Yes                    | No         | No             | 27.1                   | 1.7                      | 27     | 1.6         | nd                | nd          | 36.6    | 11.2        |
| D                         | Yes                    | No         | Yes            | 27.4                   | 2                        | 30.2   | 4.8         | nd                | nd          | Invalid | -           |
| E                         | No                     | Yes        | No             | nd                     | nd                       | nd     | nd          | 24.4/error        | -1          | nd      | nd          |
| F                         | No                     | Yes        | Yes            | nd                     | nd                       | nd     | nd          | 24.5 <sup>§</sup> | -0.9        | nd      | nd          |
| G                         | Yes                    | Yes        | No             | nd                     | nd                       | nd     | nd          | 27.0 <sup>§</sup> | 1.6         | 27.6    | 2.2         |
| H                         | Yes                    | Yes        | Yes            | nd                     | nd                       | nd     | nd          | 26.7 <sup>§</sup> | 1.3         | 29.1    | 3.7         |

<sup>#</sup>SPC-Ct; cycle threshold (Ct) of the sample processing control (SPC).

<sup>‡</sup>  $\Delta$ Ct was calculated by subtracting the reference (undiluted SR) SPC-Ct value from the SPC-Ct value obtained of each experiment from; The reference SPC-Ct value varied from 24.3 to 26.2 with a mean of  $25.4 \pm 0.7$  over the five runs conducted.

\*nd; not done.

<sup>§</sup> the results shown are the average of two test runs.
