# Supplementary material for: The Simple One-Step (SOS) Stool Processing Method for Use with the Xpert MTB/RIF Assay for a Child-Friendly Diagnosis of Tuberculosis Closer to the Point of Care
Source: PubMed Central journal article supplement (PMC8373220; doi:10.1128/jcm.00406-21), 2021-07-19
Supplement: jcm.00406-21-s0003.pdf [file jcm.00406-21-s0003.pdf]

## Supplemental material

Table S2, Details of the spiked samples and the Xpert Ultra results of the second series of laboratory experiments using the simple one step (SOS) and the two step (TS) in pairs of aliquots from the same sample

| Pairs | Stool no. | Stool appearance | Sample processing | Xpert result          | SPC -Ct |
|-------|-----------|------------------|-------------------|-----------------------|---------|
| 1     | 1         | semi solid       | SOS               | MTB trace detected    | neg     |
| 1     | 1         | semi solid       | TS                | MTB trace detected    | 29.4    |
| 2     | 2         | soft             | SOS               | error 2008            | neg     |
| 2     | 2         | soft             | TS                | MTB trace detected    | neg     |
| 3     | 2         | soft             | SOS               | MTB trace detected    | neg     |
| 3     | 2         | soft             | TS                | MTB trace detected    | neg     |
| 4     | 3         | soft             | SOS               | MTB detected very low | neg     |
| 4     | 3         | soft             | TS                | MTB detected very low | neg     |
| 5     | 3         | soft             | SOS               | MTB detected very low | neg     |
| 5     | 3         | soft             | TS                | MTB detected very low | neg     |
| 6     | 4         | soft             | SOS               | MTB detected very low | 30.2    |
| 6     | 4         | soft             | TS                | MTB not detected      | 30      |
| 7     | 4         | soft             | SOS               | MTB detected very low | 34      |
| 7     | 4         | soft             | TS                | MTB trace detected    | 28.6    |
| 8     | 5         | liquid           | SOS               | MTB trace detected    | neg     |
| 8     | 5         | liquid           | TS                | MTB trace detected    | neg     |
| 9     | 5         | liquid           | SOS               | invalid               | neg     |
| 9     | 5         | liquid           | TS                | MTB trace detected    | neg     |
| 10    | 6         | soft             | SOS               | MTB trace detected    | neg     |
| 10    | 6         | soft             | TS                | MTB not detected      | 26.3    |
| 11    | 6         | soft             | SOS               | MTB trace detected    | neg     |
| 11    | 6         | soft             | TS                | MTB detected very low | 26.9    |
| 12    | 7         | solid            | SOS               | MTB detected very low | 28.8    |
| 12    | 7         | solid            | TS                | MTB detected very low | 28.5    |
| 13    | 7         | solid            | SOS               | MTB detected very low | 31.3    |
| 13    | 7         | solid            | TS                | MTB trace detected    | 26.8    |
| 14    | 8         | semi liquid      | SOS               | MTB trace detected    | neg     |
| 14    | 8         | semi liquid      | TS                | MTB trace detected    | neg     |
| 15    | 8         | semi liquid      | SOS               | MTB trace detected    | neg     |
| 15    | 8         | semi liquid      | TS                | MTB trace detected    | neg     |
| 16    | 9         | soft             | SOS               | MTB trace detected    | neg     |
| 16    | 9         | soft             | TS                | MTB trace detected    | 36.9    |
| 17    | 9         | soft             | SOS               | MTB detected very low | 38.6    |
| 17    | 9         | soft             | TS                | MTB trace detected    | 29.1    |
| 18    | 10        | soft             | SOS               | MTB detected low      | 36.2    |
| 18    | 10        | soft             | TS                | MTB detected low      | 29.2    |
| 19    | 10        | soft             | SOS               | MTB detected low      | 33.6    |
| 19    | 10        | soft             | TS                | MTB detected very low | neg     |

|    |    |             |     |                       |      |
|----|----|-------------|-----|-----------------------|------|
| 20 | 11 | semi liquid | SOS | MTB detected very low | 32.7 |
| 20 | 11 | semi liquid | TS  | MTB trace detected    | 27.8 |
| 21 | 11 | semi liquid | SOS | MTB detected low      | 30.4 |
| 21 | 11 | semi liquid | TS  | MTB trace detected    | neg  |
| 22 | 12 | soft        | SOS | MTB detected low      | 35.7 |
| 22 | 12 | soft        | TS  | MTB detected very low | 26.6 |
| 23 | 12 | soft        | SOS | MTB detected medium   | 27.9 |
| 23 | 12 | soft        | TS  | MTB detected low      | 27   |
| 24 | 13 | soft        | SOS | MTB detected very low | neg  |
| 24 | 13 | soft        | TS  | MTB detected very low | 36.9 |
| 25 | 13 | soft        | SOS | MTB detected very low | 33.7 |
| 25 | 13 | soft        | TS  | MTB detected very low | 37   |
| 26 | 14 | soft        | SOS | MTB detected very low | neg  |
| 26 | 14 | soft        | TS  | MTB trace detected    | 29.2 |
| 27 | 14 | soft        | SOS | MTB detected very low | 38.1 |
| 27 | 14 | soft        | TS  | MTB trace detected    | 26.4 |
| 28 | 15 | liquid      | SOS | MTB detected medium   | 32.2 |
| 28 | 15 | liquid      | TS  | MTB detected very low | 29.6 |
| 29 | 15 | liquid      | SOS | MTB detected medium   | 31.8 |
| 29 | 15 | liquid      | TS  | MTB detected very low | 26.9 |

\* SOS, Simple one step stool method, \*\*TS two step stool method, @neg, negative SPC-Ct value
